# Supplementary material
Source: Research Square preprint supplement (doi:10.21203/rs.3.rs-9452494/v1)
Supplement: Supplementary file 1 [file d3898f31347a7e878697add5.docx]

**Supplementary Materials**

**Dose-response relationship of stem cell therapy in the treatment of osteoarthritis on patient-related outcomes: a meta-analysis of clinical trials**

**Supplementary Figures**

Table of Contents

[Figure S1. Summary of Cochrane Risk of Bias of individual study 1](#_Toc213871346)

[Figure S2. Forest plot of serious adverse events 2](#_Toc213871347)

[Figure S3. Forest plot of WOMAC score at 6 months 3](#_Toc213871348)

[Figure S4. Forest plot of WOMAC score at 12 months 4](#_Toc213871349)

[Figure S5. Forest plot of VAS score at 3 months 5](#_Toc213871350)

[Figure S6. Forest plot of VAS score at 6 months 6](#_Toc213871351)

[Figure S7. Forest plot of VAS score at 12 months 7](#_Toc213871352)

# **Figure S1.** Summary of Cochrane Risk of Bias of the individual study.

# **Figure S2.** Forest plot of serious adverse events

# **Figure S3.** Forest plot of the WOMAC score at 6 months

# **Figure S4.** Forest plot of the WOMAC score at 12 months

# **Figure S5.** Forest plot of VAS score at 3 months

# **Figure S6.** Forest plot of VAS score at 6 months

# **Figure S7.** Forest plot of VAS score at 12 months
